# Supplementary material for: Poor sleep quality association with higher lung cancer risk: a nested case-control study
Source: PeerJ journal article supplement (doi:10.7717/peerj.16540), 2023-12-15
Supplement: Supplemental_File_1.xlsx [file Supplemental_File_1.xlsx]

## Sheet: sleep and lung cancer
ID	cancer	times	AGE	age	pair	sex	BMI	bmi	blood pressure	educational level	economic conditions	labour intensity	stress intensity	sleep quality	siesta habit	sleep duration	snoring	smoking	alcohol drinking
LYG030404169	1	1	65	1	80	1	15.2433	1	0	1	1	1	1	2	1	1	1	1	0
LYG031003523	1	1	63	1	242	2	15.5223	1	0	1	1	1	1	2	2	2	1	1	0
LYG030902236	1	1	79	2	197	1	16.1412	1	0	1	2	1	1	1	2	2	1	1	0
LYG030700941	1	1	79	2	792	2	16.4326	1	1	1	2	1	2	2	2	1	1	0	0
LYG030603812	1	1	60	1	566	1	16.5462	1	0	1	2	2	1	2	1	1	2	1	0
LYG030101150	0	3	75	2	7	1	16.7214	1	0	1	2	1	2	2	2	1	1	0	0
LYG030900906	1	1	60	1	568	1	16.9297	1	0	1	2	2	1	2	1	1	1	1	1
LYG031302888	1	1	81	2	303	1	16.9593	1	0	1	2	1	1	1	1	1	2	0	1
LYG031505565	1	1	80	2	794	1	17.0614	1	1	1	2	1	1	1	2	1	1	0	0
LYG030900337	0	3	71	2	709	2	17.0772	1	0	1	2	1	1	2	1	1	1	0	0
LYG030500426	0	3	73	2	107	1	17.2552	1	1	1	2	2	1	1	2	1	1	1	0
LYG030603174	0	3	75	2	753	1	17.43	1	0	1	2	3	1	2	1	1	1	1	0
LYG030401151	1	1	68	2	58	1	17.8906	1	0	1	2	3	1	1	2	1	1	0	0
LYG031000823	0	3	70	2	691	1	17.9632	1	0	1	2	1	2	1	1	2	2	1	0
LYG032000484	1	1	73	2	731	1	18.1349	1	1	1	2	1	1	1	2	2	2	0	0
LYG030605412	1	1	74	2	747	1	18.2022	1	1	1	2	1	1	2	2	1	1	1	0
LYG030201236	0	3	78	2	778	1	18.3223	1	0	2	2	1	1	2	2	2	1	0	1
LYG030401276	1	1	51	1	510	1	18.4117	1	0	1	2	1	1	2	2	1	2	1	1
LYG030900738	1	1	75	2	755	2	18.6395	1	0	1	2	2	2	1	1	2	2	0	0
LYG031700346	1	1	76	2	763	1	18.8719	1	0	2	2	2	1	2	2	1	1	0	0
LYG031506993	0	3	70	2	348	1	18.907	1	0	1	2	1	1	1	2	2	1	0	0
LYG031301110	1	1	68	2	296	1	18.9318	1	0	1	2	1	2	1	2	2	1	1	0
LYG032002491	1	1	78	2	451	1	18.9866	1	0	1	2	3	1	1	2	2	1	1	0
LYG031500674	0	3	37	1	473	2	19.1847	1	0	2	2	1	1	1	2	1	2	0	0
LYG031300645	0	3	59	1	562	1	19.2421	1	1	2	1	2	1	2	1	1	2	0	0
LYG031504210	1	1	69	2	358	1	19.2523	1	0	1	2	2	2	2	2	1	1	1	0
LYG030703440	1	1	48	1	489	2	19.2535	1	0	1	2	1	1	2	1	1	1	0	0
LYG030705283	0	3	65	1	626	1	19.2668	1	0	1	2	2	1	2	1	1	2	1	1
LYG030201948	1	1	78	2	778	1	19.487	1	0	2	1	1	1	2	1	1	1	0	0
LYG030701327	1	1	75	2	159	1	19.4926	1	1	1	2	1	1	1	2	2	1	1	0
LYG030400014	1	1	61	1	578	1	19.5156	1	0	1	2	2	1	2	2	1	1	1	1
LYG030401858	0	3	70	2	700	1	19.7453	1	1	1	2	1	1	1	2	2	1	1	1
LYG031500859	1	1	59	1	326	2	19.7936	1	0	1	2	2	1	2	2	2	1	0	0
LYG032101679	0	3	57	1	550	1	19.8935	1	0	2	2	1	1	1	2	1	2	1	1
LYG030701568	1	1	82	2	160	1	20.1415	1	1	1	2	1	1	1	2	1	2	0	0
LYG032003869	0	3	78	2	451	1	20.3203	1	1	1	1	1	1	2	2	1	1	1	0
LYG031004555	1	1	75	2	253	1	20.325	1	0	1	2	2	1	2	2	1	2	0	0
LYG030702742	1	1	77	2	168	1	20.4038	1	0	1	2	2	1	2	2	1	2	0	0
LYG032000976	1	1	54	1	444	2	20.512	1	0	1	2	2	2	2	1	1	1	0	0
LYG031300218	1	1	58	1	559	1	20.5816	1	0	2	1	2	1	1	1	2	2	1	1
LYG031902779	1	1	67	2	432	1	20.595	1	0	1	2	1	1	2	1	1	1	1	0
LYG031800510	0	3	60	1	574	2	20.6329	1	1	1	2	2	1	2	1	1	1	0	0
LYG031005550	1	1	76	2	760	1	20.7031	1	1	2	2	1	2	2	1	2	1	1	1
LYG031004033	1	1	81	2	797	1	20.7074	1	0	2	2	1	1	1	2	1	1	1	1
LYG031100040	1	1	63	1	265	1	20.7612	1	1	2	2	3	1	2	1	1	1	1	0
LYG031200980	1	1	73	2	281	2	20.7725	1	1	1	2	1	1	1	2	1	1	0	0
LYG030200021	0	3	70	2	697	1	20.8191	1	1	2	1	1	1	1	2	2	1	0	0
LYG032201809	1	1	76	2	468	2	20.8247	1	1	1	2	1	1	2	1	1	1	0	0
LYG030700441	0	3	68	2	663	1	20.9107	1	1	2	2	1	1	1	1	1	2	1	1
LYG031000993	1	1	71	2	712	1	20.9129	1	0	1	2	1	1	2	2	2	1	1	0
LYG030605235	1	1	58	1	150	2	20.9365	1	1	1	2	3	2	2	1	1	2	0	0
LYG031505947	1	1	53	1	370	1	20.9572	1	1	2	2	3	2	2	1	1	1	1	1
LYG030604700	0	3	71	2	704	2	20.966	1	0	1	2	2	1	1	1	2	1	0	0
LYG030200158	0	3	51	1	508	1	21.068	1	0	2	2	2	1	2	1	1	1	0	0
LYG030604906	0	3	60	1	124	1	21.069	1	1	2	2	1	1	1	1	2	1	1	1
LYG031100812	0	3	64	1	603	1	21.1203	1	0	2	2	2	1	2	2	1	1	0	0
LYG030402223	0	3	46	1	481	1	21.1877	1	0	2	1	1	1	1	2	1	1	1	1
LYG030901887	0	3	79	2	197	1	21.2031	1	1	1	1	1	1	1	2	2	1	0	0
LYG031900649	0	3	67	2	432	1	21.2466	1	0	1	2	3	2	2	1	1	1	1	0
LYG031503308	1	1	70	2	348	1	21.2528	1	0	1	1	1	1	1	2	1	1	1	0
LYG031004862	0	3	73	2	724	1	21.289	1	0	1	2	2	1	2	1	2	1	0	1
LYG030602477	1	1	56	1	545	2	21.3053	1	1	1	2	3	1	1	1	1	2	0	0
LYG030601326	1	1	61	1	579	1	21.3858	1	1	2	2	2	2	2	2	1	2	1	1
LYG031400247	1	1	83	2	306	2	21.4405	1	1	1	1	1	1	1	2	2	1	0	0
LYG031005780	0	3	75	2	253	1	21.4533	1	0	1	1	3	1	1	1	2	1	1	1
LYG031003831	1	1	68	2	665	2	21.5019	1	0	1	2	2	1	2	1	1	1	0	0
LYG030600368	0	3	74	2	747	1	21.5512	1	0	1	1	1	1	1	2	2	1	1	1
LYG030702001	0	3	75	2	159	1	21.5994	1	1	1	2	1	1	1	2	2	1	0	0
LYG030700593	0	3	79	2	792	2	21.6	1	1	1	2	2	2	1	2	2	1	0	0
LYG030101492	1	1	75	2	7	1	21.6254	1	0	1	2	2	1	1	2	1	1	1	0
LYG031004200	0	3	63	1	242	2	21.6588	1	0	1	2	1	2	1	1	1	1	0	0
LYG031300903	0	3	79	2	299	2	21.7524	1	0	1	2	1	1	1	2	2	1	0	0
LYG030400127	0	3	51	1	510	1	21.768	1	0	1	2	2	1	2	2	1	2	0	0
LYG031501725	1	1	76	2	764	1	21.7955	1	0	1	2	2	1	1	1	1	1	1	1
LYG031500731	0	3	80	2	794	1	21.8539	1	0	1	1	1	1	1	2	2	2	1	0
LYG030101096	0	3	54	1	3	2	21.8694	1	0	1	2	2	1	2	1	1	2	0	0
LYG030702050	0	3	69	2	671	2	21.8953	1	1	1	2	1	1	2	1	1	1	0	0
LYG031005508	0	3	53	1	248	1	21.9673	1	1	2	2	3	2	1	2	2	2	0	1
LYG031504303	0	3	76	2	764	1	21.9674	1	0	1	1	2	1	2	2	2	1	1	1
LYG030701939	1	1	58	1	162	2	21.9818	1	0	1	2	2	2	2	2	1	1	0	0
LYG031004406	0	3	71	2	712	1	22.0402	1	0	1	2	1	2	1	1	1	1	0	0
LYG030902847	0	3	78	2	787	1	22.0703	1	1	1	2	1	1	1	1	1	1	1	0
LYG031802240	0	3	74	2	740	1	22.1053	1	0	1	2	1	1	2	2	1	1	1	1
LYG030502051	1	1	73	2	107	1	22.112	1	1	2	2	2	1	1	1	1	1	0	0
LYG031200098	1	1	75	2	277	2	22.1631	1	1	1	2	1	1	2	1	1	1	0	0
LYG031802390	1	1	76	2	412	1	22.1631	1	1	1	2	1	1	2	1	1	1	1	0
LYG030400445	0	3	61	1	578	1	22.1696	1	0	1	2	1	2	2	2	1	1	1	0
LYG030900232	1	1	64	1	613	1	22.1791	1	0	1	2	2	1	2	2	1	2	1	1
LYG030701147	0	3	48	1	489	2	22.1797	1	1	1	2	2	1	1	1	1	1	0	0
LYG031801283	0	3	74	2	407	2	22.2222	1	1	1	1	1	1	1	2	2	2	0	0
LYG031002502	1	1	50	1	502	2	22.2721	1	1	1	1	3	1	1	2	2	1	0	0
LYG031101478	1	1	62	1	591	2	22.3381	1	1	1	1	1	1	1	1	2	2	0	0
LYG031005158	0	3	76	2	760	1	22.39	1	0	1	2	2	1	2	1	1	1	1	1
LYG031700596	0	3	76	2	763	1	22.3908	1	0	2	2	1	1	2	2	1	2	1	0
LYG031801297	1	1	61	1	403	2	22.4892	1	1	1	2	1	2	1	1	2	1	0	0
LYG031300496	0	3	81	2	303	1	22.526	1	0	1	1	2	1	2	1	1	1	1	1
LYG030903420	1	1	79	2	787	1	22.5391	1	0	1	2	1	1	2	1	1	1	1	0
LYG031000411	1	1	48	1	487	2	22.6187	1	1	2	2	3	2	2	2	1	1	0	0
LYG030704614	0	3	82	2	160	1	22.6562	1	1	1	2	1	1	2	1	1	2	0	0
lyg031903478	1	1	53	1	521	2	22.6892	1	1	1	2	1	1	2	1	1	2	0	0
LYG031600266	1	1	65	1	623	2	22.6993	1	1	1	2	1	1	2	2	1	2	0	0
LYG031801860	1	1	74	2	740	1	22.7009	1	1	2	2	1	2	2	2	1	1	1	1
LYG031505901	0	3	65	1	339	1	22.7592	1	1	1	2	1	1	1	2	2	2	1	1
LYG030700986	1	1	75	2	157	1	22.7615	1	1	1	1	1	2	2	2	1	2	1	0
LYG030701232	0	3	73	2	729	2	22.7811	1	1	1	1	1	1	1	2	2	1	0	0
LYG030902018	1	1	56	1	194	2	22.8022	1	1	1	2	3	1	2	2	2	2	0	0
LYG030603625	0	3	68	2	125	1	22.8571	1	1	1	2	1	1	1	1	1	1	1	0
LYG030706713	0	3	73	2	161	1	22.8829	1	1	2	2	1	1	2	1	1	1	0	1
LYG030203763	1	1	62	1	42	1	22.939	1	0	1	2	2	2	2	2	1	1	1	0
LYG030902406	0	3	64	1	613	1	22.9424	1	0	1	2	3	1	2	2	1	1	0	0
LYG030702161	1	1	76	2	164	2	22.962	1	1	1	2	2	1	1	2	2	2	0	0
LYG031503103	0	3	64	1	369	1	23.0315	1	1	1	2	1	1	1	2	2	1	1	1
LYG031800903	0	3	63	1	599	2	23.0455	1	1	1	2	1	1	2	1	2	1	0	0
LYG031203061	1	1	67	2	656	1	23.0531	1	0	1	2	2	1	2	1	2	1	1	0
LYG030402122	1	1	62	1	586	1	23.067	1	1	2	2	2	1	2	2	1	2	1	0
LYG030902113	1	1	63	1	598	1	23.1084	1	0	1	2	3	1	2	2	2	1	0	1
LYG031004941	0	3	61	1	244	1	23.144	1	0	1	1	1	1	1	1	1	1	1	0
LYG032003592	0	3	74	2	731	1	23.1763	1	0	1	2	3	2	2	2	1	1	0	1
LYG031505859	1	1	64	1	369	1	23.1834	1	1	1	2	1	1	2	1	1	1	0	0
LYG030905596	1	1	78	2	781	1	23.1834	1	0	1	1	2	1	1	1	1	2	1	0
LYG030702056	1	1	62	1	163	1	23.2105	1	1	2	2	3	1	2	2	1	2	1	1
LYG031001734	0	3	81	2	797	1	23.2253	1	0	1	2	1	1	1	1	1	1	1	1
LYG030601843	0	3	73	2	146	1	23.2284	1	1	1	1	2	1	1	2	2	2	1	1
LYG031502971	1	1	56	1	546	1	23.3135	1	0	2	2	1	1	1	2	1	1	1	0
LYG030700346	1	1	74	2	154	1	23.3556	1	1	1	2	1	2	2	2	1	2	1	0
LYG031201629	1	1	73	2	725	1	23.3747	1	1	1	2	1	1	1	1	1	2	1	0
LYG031502589	0	3	56	1	546	1	23.395	1	1	2	1	3	2	1	2	2	2	1	1
LYG031201342	0	3	72	2	279	1	23.4339	1	1	1	2	2	1	1	2	1	1	1	0
LYG030902109	0	3	78	2	781	1	23.4766	1	0	2	2	3	2	2	2	1	1	0	0
LYG030205111	0	3	62	1	42	1	23.4944	1	0	2	2	1	1	1	2	1	2	1	0
LYG030101622	1	1	58	1	557	1	23.5735	1	0	1	2	2	2	2	1	1	2	0	0
LYG032001586	1	1	51	1	448	2	23.7204	1	1	1	1	1	1	1	1	2	1	0	0
LYG030703252	1	1	52	1	169	2	23.7227	1	0	1	2	3	1	1	1	1	2	0	0
LYG031506014	0	3	67	2	645	1	23.7387	1	1	2	2	1	1	1	1	1	1	1	1
LYG030400585	1	1	69	2	55	1	23.7669	1	1	1	2	1	1	1	2	2	1	1	1
LYG030603405	1	1	83	2	807	1	23.7948	1	1	1	2	1	1	1	2	2	1	0	0
LYG031502842	0	3	53	1	370	1	23.8093	1	0	2	1	3	1	1	2	2	2	1	1
LYG030701075	0	3	62	1	163	1	23.8305	1	1	2	2	2	1	2	2	2	2	1	1
LYG030200226	1	1	66	2	636	1	23.8923	1	0	2	2	3	1	1	1	1	2	1	0
LYG031500108	1	1	72	2	718	2	23.9115	1	1	1	2	1	1	2	2	2	1	0	0
LYG032000492	0	3	75	2	446	2	23.9508	1	1	1	2	3	2	2	2	1	1	0	0
LYG031201512	0	3	67	2	656	1	24.0124	2	0	1	2	1	2	1	1	1	1	0	0
LYG031501692	1	1	67	2	645	1	24.0587	2	1	1	1	2	1	1	1	1	2	1	0
LYG031503503	0	3	81	2	331	1	24.1136	2	1	1	2	2	1	2	1	1	1	1	1
LYG031901435	0	3	53	1	521	2	24.122	2	0	1	2	3	2	1	2	1	1	0	0
LYG031503204	1	1	60	1	347	2	24.1282	2	1	1	2	1	1	2	1	1	1	0	0
LYG030602660	0	3	68	2	659	1	24.1364	2	0	1	2	1	1	1	2	1	1	1	0
LYG030705299	0	3	76	2	164	2	24.1509	2	1	1	2	1	1	2	1	1	1	0	0
LYG031505861	0	3	69	2	358	1	24.1588	2	0	2	2	1	1	1	1	1	2	0	0
LYG031501636	1	1	72	2	332	2	24.1759	2	1	1	2	3	1	2	1	1	1	0	0
LYG030401342	0	3	62	1	586	1	24.2028	2	0	2	2	1	1	2	2	1	1	0	0
lyg032201385	0	3	74	2	748	1	24.2123	2	1	1	2	1	1	1	2	1	1	1	1
LYG031302376	1	1	66	2	300	1	24.2394	2	0	1	2	1	1	2	2	2	1	1	0
LYG030200053	1	1	65	1	617	1	24.257	2	1	2	2	2	2	2	1	1	2	0	0
LYG031102648	0	3	53	1	522	2	24.3046	2	0	2	2	2	1	2	1	1	1	0	0
LYG032102362	1	1	59	1	461	2	24.3046	2	1	1	1	2	1	2	1	1	1	0	0
LYG031006162	0	3	73	2	250	1	24.4177	2	1	2	2	2	1	2	1	1	1	0	0
LYG031801438	0	3	76	2	412	1	24.4193	2	1	1	2	1	1	1	1	2	1	1	0
LYG030701886	1	1	73	2	161	1	24.4245	2	1	1	1	3	1	2	1	1	2	1	1
LYG030601001	1	1	71	2	704	2	24.4256	2	0	2	2	1	2	2	1	1	1	0	0
LYG030201509	1	1	62	1	588	2	24.4355	2	1	1	2	2	2	2	2	1	2	0	0
LYG030201271	0	3	65	1	614	1	24.4405	2	0	1	2	2	1	2	2	1	1	1	0
LYG030201716	0	3	61	1	24	2	24.4531	2	0	1	2	3	2	1	1	1	2	0	0
LYG031301792	0	3	68	2	290	2	24.4675	2	0	1	2	1	1	1	2	1	2	0	0
LYG031006355	0	3	50	1	502	2	24.4784	2	0	2	2	2	2	2	1	1	1	0	0
LYG032001271	1	1	75	2	446	2	24.5113	2	0	1	2	1	1	2	2	1	2	0	0
LYG031100617	0	3	63	1	265	1	24.5188	2	1	1	2	2	1	1	1	1	1	1	1
LYG030901822	0	3	60	1	568	1	24.5356	2	0	1	2	3	1	1	2	2	2	1	0
LYG031100093	1	1	64	1	603	1	24.5588	2	0	1	2	2	1	1	2	2	1	1	0
LYG031700627	1	1	53	1	518	1	24.5689	2	0	1	2	2	1	1	2	2	2	1	1
LYG031202833	1	1	66	2	635	1	24.6548	2	1	2	2	1	2	2	1	1	1	1	1
LYG031600319	1	1	57	1	553	2	24.6825	2	0	1	2	1	1	2	2	1	2	0	0
LYG032001469	0	3	54	1	444	2	24.717	2	1	1	2	1	1	1	1	1	1	0	0
LYG031402748	0	3	69	2	674	2	24.8105	2	1	1	2	1	1	2	2	2	1	0	0
LYG031802136	1	1	68	2	657	1	24.8127	2	0	1	2	1	1	1	1	1	1	0	1
LYG030401607	0	3	70	2	692	1	24.8491	2	1	2	2	2	1	1	1	2	2	1	0
LYG031600521	1	1	54	1	382	2	24.8758	2	0	1	2	3	1	2	2	1	2	0	0
LYG030401752	0	3	68	2	58	1	24.9188	2	0	1	2	2	2	2	2	1	1	1	1
LYG030400767	0	3	69	2	55	1	24.9673	2	1	1	2	2	1	1	2	1	1	0	0
LYG031001975	0	3	68	2	665	2	24.9879	2	1	1	2	2	1	2	1	2	1	1	0
LYG030903586	0	3	63	1	598	1	25	2	1	1	2	1	1	1	2	2	1	0	1
LYG031400256	0	3	83	2	306	2	25.0379	2	1	1	2	1	1	1	2	1	1	0	0
LYG030700924	1	1	48	1	156	2	25.052	2	1	1	2	3	2	2	1	1	1	0	0
LYG031503765	0	3	60	1	347	2	25.1307	2	1	2	2	1	2	2	2	2	1	0	1
LYG030700354	0	3	75	2	157	1	25.2577	2	0	2	2	1	1	1	2	2	2	1	0
LYG031302237	0	3	79	2	791	2	25.2791	2	1	1	1	1	2	2	1	1	2	0	0
LYG030100581	1	1	54	1	3	2	25.3125	2	0	1	2	1	1	2	2	1	1	0	0
LYG031800606	1	1	66	2	640	2	25.3208	2	1	1	2	2	2	2	1	1	2	0	0
lyg031900099	1	1	76	2	765	2	25.3906	2	0	1	1	1	2	1	2	2	1	1	0
LYG030702499	0	3	74	2	154	1	25.4667	2	0	1	2	2	1	1	2	2	1	0	0
LYG031701640	0	3	53	1	518	1	25.4694	2	1	2	2	3	1	1	1	1	2	1	1
LYG031302425	0	3	58	1	559	1	25.5338	2	0	2	1	1	1	1	2	1	2	1	0
LYG031500036	1	1	37	1	473	2	25.5438	2	0	1	2	2	1	1	1	1	1	0	0
LYG031004327	1	1	73	2	250	1	25.5588	2	1	2	2	1	1	2	2	1	1	1	1
LYG030205120	0	3	66	2	636	1	25.5593	2	1	1	1	1	1	1	2	1	1	1	0
LYG030204008	1	1	74	2	736	1	25.6105	2	1	2	2	1	1	2	2	1	1	0	0
LYG031300837	1	1	77	2	772	2	25.6367	2	1	1	2	2	1	2	2	1	1	1	0
LYG031201183	0	3	54	1	530	1	25.6489	2	1	2	1	1	1	2	2	2	1	1	1
LYG030901292	0	3	56	1	194	2	25.662	2	0	1	2	3	2	2	1	1	2	0	0
LYG031801064	1	1	60	1	574	2	25.6767	2	1	1	2	2	1	1	2	2	2	0	0
LYG031003768	1	1	61	1	244	1	25.6873	2	1	1	2	1	1	2	2	2	2	1	1
LYG031301933	1	1	59	1	562	1	25.6974	2	0	1	2	2	1	2	1	1	2	0	0
LYG030603558	1	1	68	2	659	1	25.7117	2	1	1	2	3	1	2	1	1	2	1	1
LYG030705623	0	3	77	2	168	1	25.7437	2	1	1	2	2	1	2	1	1	2	0	1
LYG031200379	0	3	73	2	281	2	25.7443	2	1	1	2	1	1	2	1	1	1	0	0
LYG031300728	1	1	68	2	290	2	25.7487	2	1	1	2	1	1	2	2	1	2	0	0
LYG031200535	0	3	73	2	725	1	25.7828	2	1	2	2	2	1	2	1	1	1	0	1
LYG031503316	0	3	72	2	332	2	25.8339	2	0	1	2	2	2	2	1	1	2	0	0
LYG031302074	1	1	60	1	567	2	25.8372	2	0	1	2	1	1	1	2	2	1	0	0
LYG032202201	1	1	74	2	748	1	25.9574	2	1	2	1	1	1	1	1	2	2	0	0
LYG031101778	1	1	53	1	522	2	25.9694	2	1	2	2	1	2	1	1	1	1	0	0
LYG031800370	0	3	66	2	640	2	26.0146	2	1	1	2	3	2	2	1	1	2	0	0
LYG031200082	0	3	75	2	277	2	26.0147	2	0	1	2	1	1	2	1	1	1	0	0
LYG030102236	1	1	74	2	10	1	26.0617	2	1	1	2	1	1	2	2	1	1	1	0
LYG031005443	0	3	66	2	641	2	26.2295	2	0	1	1	1	1	1	2	1	1	0	0
LYG031501471	1	1	81	2	331	1	26.2313	2	1	1	1	1	1	1	2	1	1	0	0
LYG031202887	0	3	66	2	287	2	26.2378	2	0	1	2	2	1	1	1	1	2	0	0
LYG031600003	0	3	65	1	623	2	26.2852	2	1	1	2	2	1	2	2	1	2	0	0
LYG032002638	1	1	63	1	452	2	26.2898	2	0	1	2	2	2	2	1	1	2	0	0
LYG030204660	1	1	78	2	784	1	26.2917	2	1	2	2	1	1	1	2	1	1	0	0
LYG031502560	1	1	65	1	339	1	26.3042	2	1	1	1	1	1	1	1	1	2	1	1
LYG030705051	0	3	52	1	169	2	26.4498	2	1	1	2	1	1	2	1	1	2	0	0
LYG031004268	1	1	53	1	248	1	26.4697	2	0	1	2	2	1	1	2	2	1	0	1
LYG030601818	1	1	68	2	125	1	26.5061	2	1	2	2	2	1	2	2	2	2	1	0
LYG030201977	0	3	65	1	617	1	26.5092	2	1	1	2	1	2	1	1	2	1	0	0
LYG031600169	0	3	54	1	382	2	26.6216	2	1	1	2	1	2	1	1	2	2	0	0
LYG030203771	0	3	74	2	736	1	26.6623	2	1	1	2	2	2	2	1	1	2	0	0
LYG031303869	0	3	60	1	567	2	26.6667	2	1	1	2	2	2	1	1	1	1	0	0
LYG031301627	0	3	71	2	710	2	26.6759	2	1	1	1	1	1	1	1	1	1	0	0
LYG032200612	0	3	76	2	468	2	26.7481	2	1	1	2	1	1	2	1	1	1	0	0
LYG030600891	0	3	83	2	807	1	26.756	2	1	1	1	1	1	1	2	2	1	0	0
LYG031302111	1	1	79	2	299	2	26.7601	2	1	1	2	1	1	2	1	1	2	0	0
LYG031503807	0	3	59	1	326	2	26.8012	2	0	1	2	2	1	2	1	2	1	0	0
LYG031201602	0	3	66	2	635	1	26.8166	2	1	1	2	1	1	1	2	1	2	0	1
LYG031802507	0	3	68	2	657	1	26.8333	2	1	2	1	1	1	2	1	1	2	1	0
LYG031502612	1	1	74	2	737	1	26.8785	2	0	1	2	1	1	1	2	1	1	1	0
LYG030100519	0	3	74	2	10	1	26.9922	2	0	1	2	1	1	2	2	1	2	1	0
LYG030701777	1	1	73	2	729	2	27.0682	2	1	1	2	2	1	2	2	2	1	0	0
LYG030602250	1	1	75	2	753	1	27.1266	2	1	1	2	1	2	2	2	2	2	1	0
LYG032001478	0	3	51	1	448	2	27.1949	2	1	1	1	1	1	1	1	2	1	0	0
LYG031600370	0	3	57	1	553	2	27.3034	2	1	1	2	3	2	2	1	1	1	0	0
LYG030404502	1	1	46	1	481	1	27.3475	2	1	2	1	1	1	2	2	2	2	1	0
LYG030700913	1	1	52	1	155	2	27.5491	2	0	2	2	2	1	1	1	1	1	0	0
LYG030704437	1	1	65	1	626	1	27.5591	2	0	1	2	1	1	1	2	1	2	1	1
lyg032102658	1	1	57	1	550	1	27.5802	2	0	1	2	2	1	2	1	1	1	0	0
LYG031300408	1	1	79	2	791	2	27.5808	2	1	1	1	1	1	2	2	1	1	0	0
LYG030700458	0	3	52	1	155	2	27.5862	2	1	1	2	1	1	2	1	1	1	0	0
LYG030701269	1	1	69	2	671	2	27.5873	2	1	2	2	2	1	1	2	2	1	0	0
LYG031303322	0	3	68	2	296	1	27.6795	2	1	1	2	1	1	1	1	1	1	1	0
LYG030601583	1	1	60	1	124	1	27.692	2	0	2	2	2	1	2	1	1	1	1	0
LYG030204809	1	1	51	1	508	1	27.7698	2	1	2	2	2	1	1	1	2	2	0	1
LYG031300318	0	3	66	2	300	1	27.8626	2	1	1	2	2	2	1	1	1	1	0	0
LYG031801676	1	1	74	2	407	2	27.905	2	0	1	2	1	1	1	2	1	1	0	0
LYG030403726	0	3	65	1	80	1	27.9052	2	1	2	2	1	1	1	1	1	2	1	0
LYG030902946	1	1	72	2	713	2	27.9119	2	1	1	2	2	2	2	2	1	2	0	0
LYG031801917	1	1	63	1	599	2	27.9213	2	0	1	2	3	1	2	1	2	2	0	0
LYG031501220	0	3	72	2	718	2	27.9381	2	1	1	2	1	1	2	2	2	2	0	0
LYG030604689	0	3	60	1	566	1	27.964	2	1	2	2	3	1	2	1	1	2	0	1
LYG030200128	0	3	62	1	588	2	28.0388	2	1	2	2	3	1	1	1	2	2	0	0
LYG031400925	1	1	64	1	310	2	28.1068	2	0	1	2	3	2	1	1	1	1	0	0
LYG031902540	0	3	76	2	765	2	28.1984	2	1	1	2	1	1	2	1	1	1	1	1
LYG032100070	0	3	59	1	461	2	28.229	2	1	1	2	1	1	1	2	2	2	0	0
LYG031400237	0	3	64	1	310	2	28.29	2	1	1	2	2	1	1	1	2	2	0	0
LYG030402762	1	1	70	2	692	1	28.3112	2	1	1	2	1	1	2	1	1	2	1	0
LYG031506909	0	3	74	2	737	1	28.441	2	1	1	2	2	1	1	1	2	1	0	1
LYG030401561	1	1	70	2	700	1	28.492	2	0	2	2	2	1	2	2	1	2	0	1
LYG031100512	0	3	62	1	591	2	28.4958	2	1	1	1	1	1	2	2	1	1	0	0
LYG030604233	1	1	73	2	146	1	28.4964	2	1	1	1	1	1	1	2	2	2	1	1
LYG031200225	1	1	72	2	279	1	28.5066	2	1	1	2	1	1	1	2	2	2	0	0
LYG031506328	1	1	54	1	373	2	28.5215	2	0	1	2	2	1	1	2	1	1	0	0
LYG031300168	1	1	71	2	710	2	28.6726	2	0	1	2	1	1	1	2	2	1	0	0
LYG030102356	1	1	67	2	13	2	28.7201	2	1	1	1	1	1	1	2	1	2	0	0
LYG030705154	1	1	68	2	663	1	28.7652	2	1	2	1	1	1	1	1	1	1	1	1
LYG030602350	0	3	61	1	579	1	28.8066	2	0	1	2	3	1	2	1	1	2	1	1
LYG031301888	0	3	62	1	289	2	29.0686	2	1	1	1	1	1	1	1	1	1	0	0
LYG030203734	0	3	78	2	784	1	29.0791	2	1	1	1	1	1	1	2	2	1	1	0
LYG030101473	0	3	58	1	557	1	29.2027	2	0	1	2	1	1	1	1	1	2	1	0
LYG031000752	1	1	66	2	641	2	29.5257	2	1	1	1	2	2	2	1	1	2	0	0
LYG031004715	1	1	70	2	691	1	29.6425	2	1	2	2	2	1	2	1	1	1	0	0
LYG030900450	0	3	75	2	755	2	29.7429	2	1	1	2	1	1	1	2	2	1	0	0
LYG031500262	0	3	54	1	373	2	29.7918	2	1	1	2	2	1	1	2	1	2	0	0
LYG031201710	1	1	54	1	530	1	29.9688	2	1	1	2	1	2	2	2	2	1	1	0
LYG030602343	0	3	58	1	150	2	30.017	2	0	1	2	1	2	2	2	1	1	0	0
LYG031802449	0	3	61	1	403	2	30.3382	2	0	1	2	1	1	2	1	1	2	0	0
LYG031300225	0	3	77	2	772	2	30.4545	2	1	1	1	1	1	1	2	2	1	0	0
LYG030702332	0	3	58	1	162	2	30.6222	2	1	1	2	2	2	2	2	1	1	0	0
LYG032002070	0	3	63	1	452	2	30.8493	2	1	1	2	1	1	2	1	1	2	0	0
LYG030102172	0	3	67	2	13	2	30.863	2	0	1	1	1	1	1	2	1	2	0	1
LYG031300427	1	1	62	1	289	2	30.9496	2	1	1	2	1	2	2	1	1	1	0	0
LYG030901356	0	3	72	2	713	2	30.9631	2	1	1	2	1	2	1	2	2	2	0	0
LYG030201574	1	1	61	1	24	2	31.1259	2	1	1	2	2	2	2	2	1	2	0	0
LYG031001436	0	3	48	1	487	2	31.1636	2	0	1	2	3	2	2	1	2	1	0	0
LYG031400458	1	1	69	2	674	2	31.5512	2	1	1	2	1	1	2	1	2	2	0	0
LYG030705297	0	3	48	1	156	2	31.6847	2	0	1	2	1	1	1	1	2	1	0	0
LYG030201813	1	1	64	1	614	1	31.8457	2	1	1	2	3	1	2	1	1	1	0	0
LYG030200523	1	1	70	2	697	1	31.8473	2	1	1	2	1	2	2	1	1	1	1	0
LYG031202882	1	1	66	2	287	2	31.8842	2	1	1	2	2	1	1	1	1	2	0	0
LYG030603191	0	3	56	1	545	2	32.8208	2	1	1	2	1	1	1	2	2	2	0	0
LYG031006366	1	1	73	2	724	1	33.9119	2	1	1	2	2	2	2	1	1	1	0	0
LYG030901813	1	1	71	2	709	2	45.3333	2	1	1	2	1	1	1	2	2	1	0	0
